# Supplementary material for: Antihypertensive Effects of Gynura divaricata (L.) DC in Rats with Renovascular Hypertension
Source: PubMed Central journal article supplement (PMC7692656; doi:10.3390/nu12113321), 2020-10-29
Supplement: nutrients-12-03321-s001.pdf [file nutrients-12-03321-s001.pdf]

Supplementary Materials.

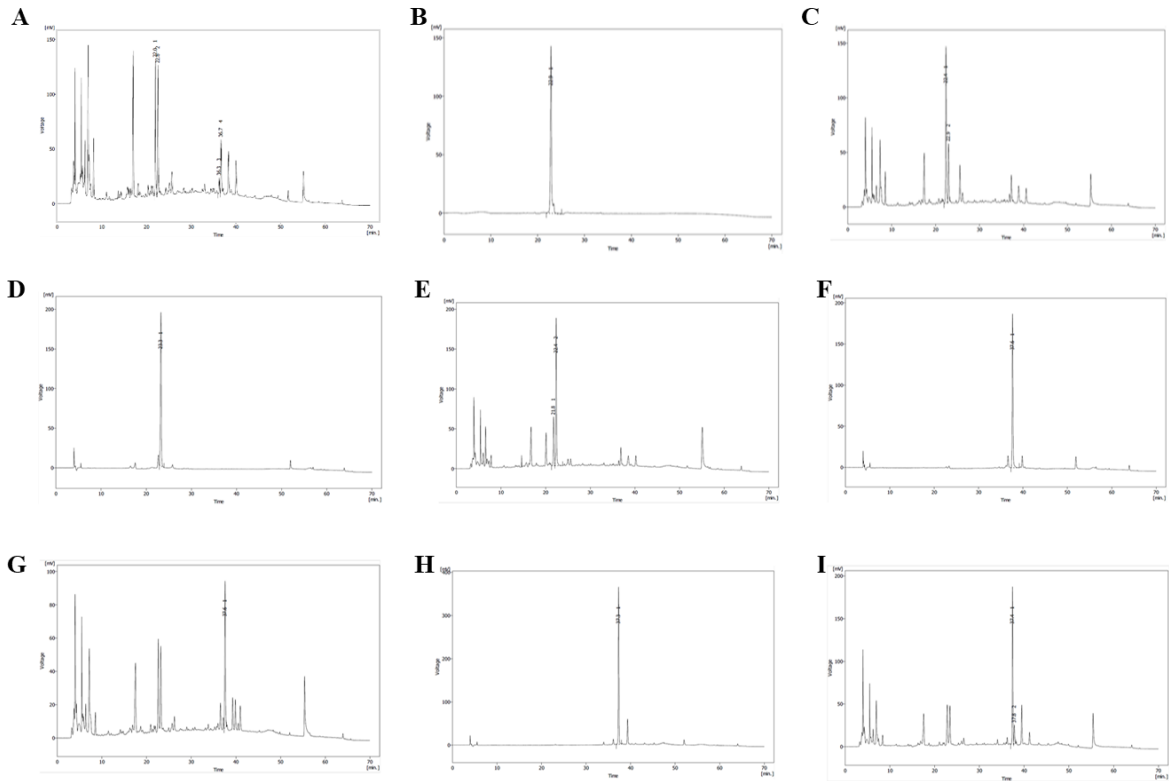

Supplementary Figure 1: High-performance liquid chromatography (HPLC) chromatograms of *Gynura divaricata* (L.) DC (GD). (A) GDa; (B) GDB2-3; (C) GDB2-3 with GDa; (D) GDB2-4; (E) GDB2-4 with GDa; (F) GDB4-1; (G) GDB4-1 with GDa; (H) GDB4-4; (I) GDB4-4 with GDa.

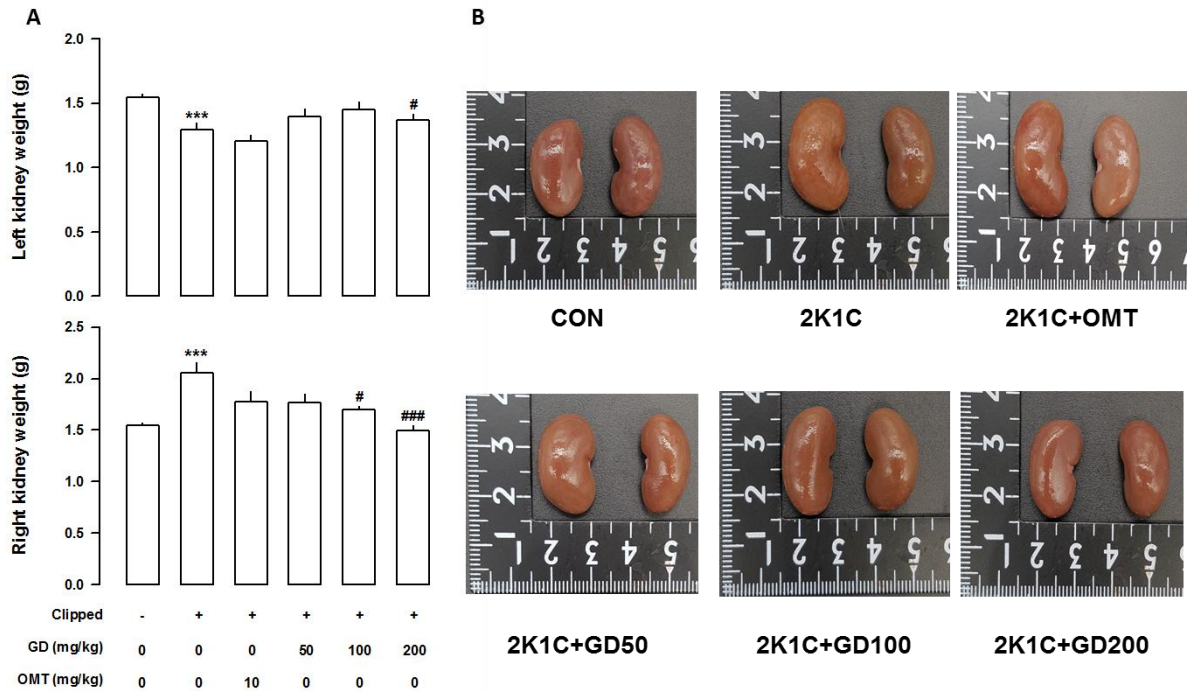

**Supplementary Figure 2: Effects of *Gynura divaricata* (L.) DC (GD) on kidney weight and shape.** (A) Effect of GD on the left and right kidney weight; (B) Kidney size. Each value shows the mean  $\pm$  standard error ( $n = 10$  per group). \*\*\*  $p < 0.001$ , vs. CONT and #  $p < 0.05$ , ###  $p < 0.0001$  vs. 2K1C.

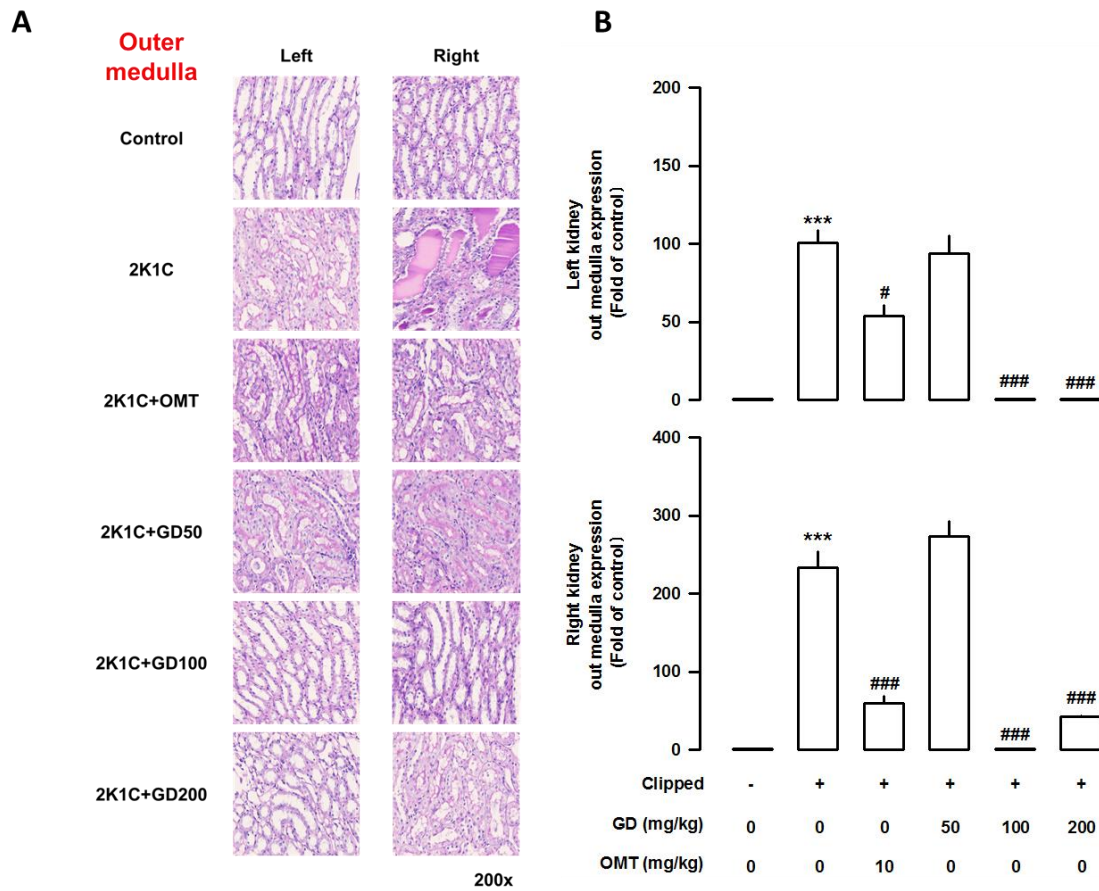

**Supplementary Figure 3: Effects of *Gynura divaricata* (L.) DC (GD) on kidney outer medullar fibrosis.** (A) Periodic acid-Schiff staining of the kidney in the outer medulla (magnification  $\times 200$ ); (B) Quantitative assessments, representing the results of five independent experiments. The values are expressed as the mean  $\pm$  standard error ( $n = 5$  per group). \*\*\*  $p < 0.001$ , vs. CONT and #  $p < 0.05$ , ###  $p < 0.0001$  vs. 2K1C.

**Supplementary Table 1.**  $EC_{50}$  and  $E_{max}$  values for ACh, SNP, and ANP-induced relaxation of GD treatment in 2K1C rats.

|            | ACh                 |                    | SNP                 |                    | ANP                 |                    |
|------------|---------------------|--------------------|---------------------|--------------------|---------------------|--------------------|
|            | $E_{max}$ (%)       | $\log EC_{50}$ (M) | $E_{max}$ (%)       | $\log EC_{50}$ (M) | $E_{max}$ (%)       | $\log EC_{50}$ (M) |
| cont       | 93.70 $\pm$ 2.83    | -8.81 $\pm$ 0.05   | 91.34 $\pm$ 0.54    | -8.99 $\pm$ 0.03   | 80.60 $\pm$ 2.00    | -8.44 $\pm$ 0.28   |
| 2K1C       | 59.61 $\pm$ 2.22*** | -7.79 $\pm$ 0.09*  | 77.72 $\pm$ 3.77**  | -8.14 $\pm$ 0.07*  | 54.64 $\pm$ 7.28**  | -8.00 $\pm$ 0.31*  |
| 2K1C+OMT   | 92.22 $\pm$ 3.79##  | -8.45 $\pm$ 0.17#  | 97.72 $\pm$ 1.52### | -8.88 $\pm$ 0.02#  | 88.91 $\pm$ 2.71### | -8.69 $\pm$ 0.06#  |
| 2K1C+GD50  | 76.45 $\pm$ 3.46    | -8.09 $\pm$ 0.07   | 84.71 $\pm$ 2.76    | -8.66 $\pm$ 0.05   | 72.85 $\pm$ 4.49#   | -8.51 $\pm$ 0.08#  |
| 2K1C+GD100 | 86.28 $\pm$ 3.12##  | -8.12 $\pm$ 0.08   | 90.96 $\pm$ 2.88#   | -8.84 $\pm$ 0.03#  | 80.09 $\pm$ 4.17##  | -9.36 $\pm$ 0.10#  |
| 2K1C+GD200 | 92.72 $\pm$ 4.08##  | -9.03 $\pm$ 0.14#  | 88.74 $\pm$ 2.43#   | -8.94 $\pm$ 0.03#  | 76.41 $\pm$ 4.07#   | -9.36 $\pm$ 0.09#  |

EC<sub>50</sub> and E<sub>max</sub> values of ACh, SNP, and ANP were calculated of the relaxation-response curves to GD treatment in 2K1C rats. Values are means ±SE of 6 experiments for EC<sub>50</sub> and E<sub>max</sub>. \*p < 0.01, \*\*p < 0.01 \*\*\*p < 0.01 vs. Cont.; # p < 0.05, ##p < 0.01, and ### p < 0.001 vs. 2K1C.
